# Supplementary material for: Natural deep eutectic solvent mediated extrusion for continuous high-solid pretreatment of lignocellulosic biomass
Source: Royal Society of Chemistry journal article supplement (doi:10.1039/d0gc01560a), 2020-01-01
Supplement: d0gc01560a1.pdf [file d0gc01560a1.pdf]

**Natural deep eutectic solvent mediated extrusion for continuous high-solid pretreatment of  
lignocellulosic biomass**

Binling Ai,<sup>a, b</sup> Wenqi Li,<sup>b</sup> Joseph Woomer,<sup>b</sup> Mi Li,<sup>c</sup> Yunqiao Pu,<sup>d</sup> Zhanwu Sheng,<sup>a</sup> Lili Zheng,<sup>a</sup>  
Akinbode Adedeji,<sup>b</sup> Arthur J. Ragauskas<sup>c,d,e</sup> and Jian Shi <sup>\*b</sup>

<sup>a</sup>Haikou Experimental Station, Chinese Academy of Tropical Agricultural Sciences, Haikou,  
Hainan 571101, China

<sup>b</sup>Biosystems and Agricultural Engineering, University of Kentucky, Lexington, KY 40546, USA

<sup>c</sup>Department of Forestry, Wildlife, and Fisheries, Center for Renewable Carbon, University of  
Tennessee Institute of Agriculture, Knoxville, TN 37996, USA

<sup>d</sup>Joint Institute of Biological Science, Center for BioEnergy Innovation, Biosciences Division,  
Oak Ridge National Laboratory, Oak Ridge, TN 37831, USA

<sup>e</sup>Department of Chemical and Biomolecular Engineering, University of Tennessee, Knoxville,  
TN 37996, USA

\*Corresponding to: Dr. Jian Shi, University of Kentucky

Email: [j.shi@uky.edu](mailto:j.shi@uky.edu); Phone: (859) 218-4321; Fax: (859) 257-5671

Table S1 Assignments of the lignin  $^{13}\text{C}$ - $^1\text{H}$  correlation signals observed in the HSQC spectra of the sorghum lignins <sup>1-3</sup>

| Labels                              | $\delta_{\text{C}}/\delta_{\text{H}}$ (ppm) | Assignment                                                                                          |
|-------------------------------------|---------------------------------------------|-----------------------------------------------------------------------------------------------------|
| <b>B<sub>β</sub></b>                | 53.2/3.47                                   | C <sub>β</sub> /H <sub>β</sub> in β-5' phenylcoumaran substructures (B)                             |
| <b>C<sub>β</sub></b>                | 53.6/3.06                                   | C <sub>β</sub> /H <sub>β</sub> in β-β' resinol substructures (C)                                    |
| <b>OMe</b>                          | 55.5/3.71                                   | C/H in methoxyls                                                                                    |
| <b>A<sub>γ</sub></b>                | 59.8/3.36 & 3.58                            | C <sub>γ</sub> /H <sub>γ</sub> in normal (γ-hydroxylated) β-O-4' substructures (A)                  |
| <b>I<sub>γ</sub></b>                | 61.4/4.08                                   | C <sub>γ</sub> /H <sub>γ</sub> in cinnamyl alcohol end-groups (I)                                   |
| <b>B<sub>γ</sub></b>                | 62.5/3.75                                   | C <sub>γ</sub> /H <sub>γ</sub> in β-5' phenylcoumaran substructures (B)                             |
| <b>I'<sub>γ</sub></b>               | 64.1/4.70                                   | C <sub>γ</sub> /H <sub>γ</sub> in γ-acylated cinnamyl alcohol end-groups (I')                       |
| <b>A'<sub>γ</sub></b>               | 62.8/3.70                                   | C <sub>γ</sub> /H <sub>γ</sub> in γ-acylated β-O-4' substructures (A')                              |
| <b>HK<sub>α</sub></b>               | 85.2/4.63                                   | C <sub>α</sub> /H <sub>α</sub> in Hibbert ketone (HK)                                               |
| <b>C<sub>γ</sub></b>                | 71.2/3.80 & 4.17                            | C <sub>γ</sub> /H <sub>γ</sub> in β-β' resinol substructures (C)                                    |
| <b>A<sub>α</sub>/A'<sub>α</sub></b> | 71.5/4.75 & 71.9/4.89                       | C <sub>α</sub> /H <sub>α</sub> in β-O-4' substructures (A, A') -G&-S, respectively                  |
| <b>A'<sub>β(G)</sub></b>            | 83.0/4.23                                   | C <sub>β</sub> /H <sub>β</sub> in γ-acylated β-O-4' substructures linked to a G unit (A')           |
| <b>A'<sub>β(S)</sub></b>            | 83.3/4.33                                   | C <sub>β</sub> /H <sub>β</sub> in γ-acylated β-O-4' substructures linked to an S unit (A')          |
| <b>A<sub>β(G)</sub></b>             | 83.4/4.31                                   | C <sub>β</sub> /H <sub>β</sub> in β-O-4' substructures linked to a G unit (A)                       |
| <b>C<sub>α</sub></b>                | 85.2/4.63                                   | C <sub>α</sub> /H <sub>α</sub> in β-β' resinol substructures (C)                                    |
| <b>A<sub>β(S)</sub></b>             | 85.8/4.09                                   | C <sub>β</sub> /H <sub>β</sub> in β-O-4' substructures linked to an S unit (A)                      |
| <b>B<sub>α</sub></b>                | 87.0/5.46                                   | C <sub>α</sub> /H <sub>α</sub> in β-5' phenylcoumaran substructures (B)                             |
| <b>T<sub>8</sub></b>                | 94.3/6.56                                   | C <sub>8</sub> /H <sub>8</sub> in triclin units (T)                                                 |
| <b>T<sub>6</sub></b>                | 99.0/6.22                                   | C <sub>6</sub> /H <sub>6</sub> in triclin units (T)                                                 |
| <b>S<sub>2/6</sub></b>              | 103.9/6.65                                  | C <sub>2</sub> /H <sub>2</sub> and C <sub>6</sub> /H <sub>6</sub> in etherified syringyl units (S)  |
| <b>T<sub>2'/6'</sub></b>            | 104.1/7.29                                  | C <sub>2'</sub> /H <sub>2'</sub> and C <sub>6'</sub> /H <sub>6'</sub> in triclin units (T)          |
| <b>T<sub>3</sub></b>                | 104.9/7.03                                  | C <sub>3</sub> /H <sub>3</sub> in triclin units (T)                                                 |
| <b>S'<sub>2/6</sub></b>             | 106.4/7.26                                  | C <sub>2</sub> /H <sub>2</sub> and C <sub>6</sub> /H <sub>6</sub> in α-oxidized syringyl units (S') |
| <b>G<sub>2</sub></b>                | 110.9/6.95                                  | C <sub>2</sub> /H <sub>2</sub> in guaiacyl units (G)                                                |
| <b>FA<sub>2</sub></b>               | 111.0/7.30                                  | C <sub>2</sub> /H <sub>2</sub> in ferulic acid units (FA)                                           |
| <b>G'<sub>2</sub></b>               | 112.5/7.29                                  | C <sub>2</sub> /H <sub>2</sub> in α-oxidized guaiacyl units (G')                                    |
| <b>pCA<sub>β</sub></b>              | 113.7/6.28                                  | C <sub>β</sub> /H <sub>β</sub> in p-coumarate (pCA)                                                 |
| <b>FA<sub>β</sub></b>               | 113.7/6.28                                  | C <sub>β</sub> /H <sub>β</sub> in p-ferulate (FA)                                                   |
| <b>H<sub>3/5</sub></b>              | 114.5/6.63                                  | C <sub>3</sub> /H <sub>3</sub> and C <sub>5</sub> /H <sub>5</sub> in p-hydroxyphenyl units (H)      |
| <b>G<sub>5</sub></b>                | 115.1/6.75 & 6.98                           | C <sub>5</sub> /H <sub>5</sub> in guaiacyl units (G)                                                |
| <b>G<sub>6</sub></b>                | 118.8/6.78                                  | C <sub>6</sub> /H <sub>6</sub> in guaiacyl units (G)                                                |
| <b>I'<sub>β</sub></b>               | 123.5/6.40                                  | C <sub>β</sub> /H <sub>β</sub> in γ-acylated cinnamyl alcohol end-groups (I')                       |
| <b>H<sub>2/6</sub></b>              | 127.9/7.21                                  | C <sub>2</sub> /H <sub>2</sub> and C <sub>6</sub> /H <sub>6</sub> in p-hydroxyphenyl units (H)      |
| <b>I<sub>β</sub></b>                | 128.8/6.21                                  | C <sub>β</sub> /H <sub>β</sub> in cinnamyl alcohol end-groups (I)                                   |
| <b>pCA<sub>2/6</sub></b>            | 130.0/7.22                                  | C <sub>2</sub> /H <sub>2</sub> and C <sub>6</sub> /H <sub>6</sub> in p-coumarate (pCA)              |
| <b>pCA<sub>α</sub></b>              | 144.8/7.22-7.52                             | C <sub>α</sub> /H <sub>α</sub> in p-coumarate (pCA)                                                 |
| <b>FA<sub>α</sub></b>               | 144.8/7.22-7.52                             | C <sub>α</sub> /H <sub>α</sub> in p-ferulate (FA)                                                   |

## Reference:

1. C. G. Yoo, Y. Pu, M. Li and A. J. Ragauskas, *ChemSusChem*, 2016, **9**, 1090-1095.
2. S.-L. Sun, J.-L. Wen, M.-G. Ma and R.-C. Sun, *J. Agric. Food. Chem.*, 2014, **62**, 8120-8128.
3. L. Das, M. Li, J. Stevens, W. Li, Y. Pu, A. J. Ragauskas and J. Shi, *ACS Sustainable Chemistry & Engineering*, 2018, **6**, 10408-10420.
